# Supplementary material for: The role of specialists in financial reporting: Evidence from pension accounting
Source: Springer Nature journal article supplement (doi:10.1007/s11142-017-9404-4), 2017-06-01
Supplement: MOESM1 [file 12331942]

**ONLINE APPENDIX TO “The role of specialists in financial reporting: Evidence from pension accounting”, Review of Accounting Studies**

Divya Anantharaman

Rutgers Business School

1 Washington Park, #916

Newark, NJ 07102

[divyaa@rutgers.edu](mailto:divyaa@rutgers.edu)

<http://andromeda.rutgers.edu/~divya/>

| Table OA1 | Procedure for matching potential sample to Form 5500s |
| --- | --- |
| Table OA2 | Variable definitions for new variables used in the online appendix |
| Table OA3 | Cross-sectional partitions by incentives to understate discount rates |
| Table OA4 | Balance sheet incentives or income statement incentives? |
| Table OA5 | Examining debt covenant violations |
| Table OA6 | Incentives arising from non-actuarial services provided by the actuary |
| Table OA7 | How auditor monitoring interacts with client pressure on actuaries |
| Table OA8 | Replicating the results with fee-based client importance measures |
| Table OA9 | Within-plan sponsor tests of H1 |

**Table OA1: Procedure for matching potential sample to Form 5500s**

The Form 5500 universe consists of 396,500 filings, with 42,000–47,000 plan-level filings per year from 2000–2007 and a partial set of filings (~7,000) for 2008. The Compustat universe is firm level. As each firm on Compustat could sponsor multiple plans, each of which files a separate Form 5500, the matching of Compustat to Form 5500s is one-to-many.

1. The only common identifier across Compustat and Form 5500s is the Employer Identification Number (EIN). The EIN does not provide an exact match, though, as a firm may have multiple EINs. (Single-unit firms—those with only one establishment—have only one EIN. Multi-unit firms, with at least two establishments, could have a cluster of EINs.) It is common for firms with multiple plans to make Form 5500 filings under different EINs, making an automated match on EINs noisy and incomplete, as Compustat only provides one EIN. As a first step, I expand on the list of Compustat-provided EINs and make it more complete. Unfortunately, no comprehensive public database of EINs exists nor any lookup service for the same, but private data providers offer these services. I turn over all *GVKEY*s from Compustat Pensions with nonzero pension liabilities to Judy Diamond Associates, Inc., which offers an EIN Finder service with a database of over 7 million EINs. This service identified many EINs missing from Compustat and additional EINs for multi-unit firms. With this information, I do the first round of automated matching on EINs. At this stage, a match to Form 5500s is found for 3,270 firm-years in the potential sample (56.5% of the potential sample of 5,790 observations, see Table OA1.1).
2. In the second round of matching, I look for matches between company name on Compustat and plan sponsor name on the Form 5500s. (The “plan sponsor” is the firm sponsoring the plan, and offers the equivalent to company name on Compustat.) I run a fuzzy-match algorithm to identify similarities between company name and plan sponsor name across Compustat and Form 5500s and then manually examine each potential match identified. I declare a match only if the company/sponsor name, business description, and location all match. Furthermore, if any *GVKEY* in the potential sample remains totally unmatched at this point, I look up the Form 5500 database for that company by searching manually on all possible keyword fragments from the company name as listed on Compustat. This second round of manual matching between company name and plan sponsor name yields matches for 572 firm-years in the potential sample (9.9% of the potential sample of 5,790 observations). Of the 572 matches, 553 are for observations that were previously unmatched in the previous round, and 19 are for observations that were previously matched but for which additional plans are found to be matches.
3. Firms could remain unmatched at this stage if, for example, their plans are foreign (i.e., provide benefits to non-US workers) or if the Form 5500 filing is made by a majority- or fully owned subsidiary of the firm listed on Compustat. For firms in the potential sample that remain completely unmatched at this point, I search through 10-Ks and *Bloomberg Businessweek* online to identify subsidiary names and then look up the Form 5500 database for the subsidiary. I also look up corporate websites of these firms to identify any name changes and look up Form 5500 filings by old names. This process yields many more matches, particularly for utilities and financial firms, which are held in complex ownership structures. Therefore I iterate back through all the utilities and financial firms in the potential sample (even those with previous matches found) and look for subsidiary names or name changes. This third round of matching yields matches for 564 observations in the potential sample (9.7% of the potential sample of 5,790 observations). Of these 564 matches, 340 are for observations that were previously unmatched from the first two rounds and 224 are for observations with previous matches, for which additional plans are found to be matches. Match rates for the three rounds of matching are:

**Table OA1.1: Match rates of potential sample to Form 5500 data**

| *Year* | *Observations matched to Form 5500* | *Further details* |
| --- | --- | --- |
| Matched in first round of EIN-based matching | 3,270 firm-years (56.5% of potential sample of 5,790 firm-years) |  |
| Matched in second round of company name-to-sponsor name matching | 572 firm-years (9.9% of potential sample of 5,790 firm-years) | Of which:  553 unmatched previously +  19 matched previously |
| Matched in third round of non-exact name matching (i.e., matching on subsidiary name / former company name) | 564 firm-years (9.7% of potential sample of 5,790 firm-years) | Of which:  340 unmatched previously + 224 matched previously |
| Total sample 2000–2004, 2006–2008 |  | 4,163 (3,270 + 553 + 340)  (71.9% of potential sample of 5,790) |
| Sample 2000-2004, 2006-2007* |  | 3,901 (76.9% of potential sample of 5,070) |

*Form 5500 filings database is incomplete for 2008.

1. One further aspect of the matching is that for the 4,163 Compustat firm-years successfully matched to Form 5500s, the Form 5500 plans identified as matches need not necessarily represent 100% of that sponsor’s pension plans. As many plan sponsors have multiple plans, the three rounds of matching need not necessarily have identified all the plans sponsored by that company. Table OA1.2 reports the following: for the 4,163 firm-years in the potential sample that have been matched to at least one plan on the Form 5500, what proportion of assets have been matched?

Before tabulating these statistics, I adjust Compustat pension assets to remove the assets of foreign plans. Foreign plans (plans for workers based outside the US) are one reason for mismatch: they will be included in total pension assets reported on the 10-K but not on Form 5500s, which are only required for US-based plans. Therefore, for all 4,163 firm-years, I hand-collect from 10-K pension footnotes the disclosures of US-based pension assets, *wherever the footnote disaggregates data into US-based and foreign-based plans*.

**Table OA1.2: Proportion of US-based pension assets from 10-Ks matched to Form 5500 pension assets**

Total US-based pension assets from 10-Ks for the 4,163 firm-years are $5,834,940m.

| *Year* | *Observations matched to Form 5500* | *Total Form 5500 pension assets (in $m)* | *Total Form 5500 pension assets (as % of total Compustat US pension assets of $5,834,940m)* |
| --- | --- | --- | --- |
| Matched in first round of EIN-based matching | 3,270 firm-years | 3,141,630 | 53.8% |
| Matched in second round of company name-to-sponsor name matching: |  |  |  |
|  | 553 unmatched previously | 997,200 | 17.1% |
|  | 19 matched previously | 19,434 | 0.3% |
| Matched in third round of non-exact name matching (i.e., matching on subsidiary name / former company name) |  |  |  |
|  | 340 unmatched previously | 221,357 | 3.8% |
|  | 224 matched previously | 395,912 | 6.8% |
| Total assets |  | 4,775,534 | 81.8% |

Note that, even if matching is complete and exhaustive to the extent allowed by public disclosures, there could be a difference between US-based pension assets from 10-Ks and Form 5500 pension assets, for a number of reasons.

1. In Form 5500s, all numbers are stated to the $, whereas 10-K filings typically disclose numbers only to a level of precision of $000, $m, or even $bn.
2. Form 5500 measurement dates do not always correspond to fiscal year-end dates, before provisions in SFAS 158 *Employers’ Accounting for Defined Benefit Pension and Other Postretirement Plans* became effective in 2008. Therefore the Form 5500 valuation and the 10-K valuation could be quite different if large swings in asset values have occurred between the two dates. When the plan measurement date does not correspond to the fiscal year-end, I match so as to minimize the difference between the plan measurement year-end month and Compustat fiscal year-end month.
3. Even if measurement dates correspond to fiscal year-end dates, the actuarial valuation of plan liabilities and assets could be as any of date in the plan year.
4. The measurement basis in both Form 5500 and 10-K is current fair market value, but other differences could exist in basis, for example, in the Form 5500, contributions set aside and designated for that year but not yet paid into the trust should not be included.
5. Finally, the disaggregation of US- and non-US pension information on the 10-K is essentially voluntary, so the measure of US-based pension assets from the 10-K does include some foreign plans, for firms that choose not to disaggregate on the 10-K.
6. For the firm-years in the potential sample for which no match has yet been found to Form 5500s (5,790 – 4,163), I try to identify the reason (for example, foreign plan).

**Table OA1.3: Potential sample that is unmatched: possible reasons**

| *Possible reason* | *% sample* |
| --- | --- |
| *GVKEY*-EIN match found but no Form 5500 filing for that year | 36.3% |
| Plans are all foreign as disclosed on the 10-K | 20.7% |
| Utility: parent or subsidiary already matched | 7.9% |
| No match found and no reason identifiable | 35.1% |

**Table OA2: Variable definitions for new variables used in the Online Appendix**

As all Form 5500 data are at the plan level and each plan sponsor could have more than one plan, all Form 5500 measures are rolled up to the sponsor level.

| *Variable name* | *Definition and data source* |
| --- | --- |
| *FEEIMPNAT (FEEIMPOFF, FEEIMPIND)* | Professional fees from each plan sponsor client in a particular year / Sum of fees from all plan clients of that actuary in that year. The denominator is constructed by summing up actual professional fees (*FEEPLAN* from Table OA8.1), wherever it is disclosed and nonzero, and predicted professional fees (*FEEHATPLAN*) otherwise. The prediction model for fees is tabulated in Table OA8. When a sponsor has more than one plan, the procedure described for *EIMP* is used. The denominator is defined at the firm, office, or individual-actuary level for *FEEIMPNAT*, *FEEIMPOFF*, and *FEEIMPIND*, respectively. |
| *DURINDEX* | Index of pension duration. All observations are sorted independently in ascending order of *%ACTIVEUNVEST*, *%ACTIVEVEST*, -1**%RETIRED*, *NORMALCOST*, -1**DISBURSEMENTS*, and -1**%FROZEN*, and -1**%CASHBAL* and assigned a rank *q* (1-4) if the observation falls into the *q*th quartile of the distribution of that variable. Ranks are added up to form *DURINDEX*. Higher (lower) values imply longer (shorter) duration. |
| *AUDINDEX* | Index of auditor monitoring, calculated as *10KBIG4* + Quartile rank(*LnAUDOFFICESIZE*) sorted in ascending order + Quartile rank(*AUDFEEIMP*) sorted in ascending order + *%F5500BIG4* + (1-*%LIMSCOPE*). Higher (lower) values indicate stronger auditor monitoring. |
| *ACTUARY_AUD* | An indicator set to one if the actuarial firm also happens to be an accounting firm, as identified by that firm appearing in Audit Analytics as the auditor for a publicly traded issuer. |
| *ACTUARY_AUD*  *_PRESOX (ACTUARY_AUD*  *_POSTSOX)* | Indicator set to one if *ACTUARY_AUDITOR* =1 and the fiscal year-end is pre-July 2002 (on or after July 2002). |
| *ACTUARY_CC1* | An indicator set to one if the actuarial firm also provides compensation consulting services, as identified by this firm being named as the compensation consultant in proxy statements of *any* publicly traded issuer in the Final Sample, and to zero otherwise. Only coded for 2006 and later, as compensation consulting disclosures are only required after that date. |
| *ACTUARY_CC2* | An indicator set to one if the actuarial firm is a named compensation consultant (to compensation committee or management) for that very issuer and to zero otherwise. Only coded for 2006 and later, after compensating consulting disclosures become available in proxy statements. |

**Table OA3: Cross-sectional partitions by incentives to understate discount rates**

Table OA3 presents results of estimating Eq. (1) but partitioning now on cross-sectional incentives to understate discount rates. Columns (1a)–(b) partition on the client firm’s marginal tax rate (*MTR*), with mean *MTR* of 30% (35%) in the low (high) group. As contributions to plans are tax deductible up to a certain funding limit, higher-*MTR* firms benefit more from understating discount rates (and understating funding status, as a result) because it allows higher tax-deductible contributions into the plan.

Column (2) exploits another setting in which plan sponsors have been shown to manipulate discount rates downward: when getting ready to freeze or renegotiate benefits. This column presents results of interacting the three *EIMP* measures with *FREEZET+1,* to examine whether client importance affects sponsors’ ability to worsen the reported funding status just ahead of negotiations with the labor force.

|  | *(1a)* | *(1b)* | *(2)* |
| --- | --- | --- | --- |
|  | *Low MTR* | *High MTR* | *All observations* |
| *Dependent variable* | *DR* | *DR* | *DR* |
| *EIMPNAT* | -0.152 | 0.038 | -0.055 |
|  | (0.17) | (0.22) | (0.13) |
| *EIMPOFF* | 0.129** | 0.043 | 0.067* |
|  | (0.05) | (0.05) | (0.04) |
| *EIMPIND* | 0.009 | 0.058*** | 0.027** |
|  | (0.02) | (0.02) | (0.01) |
| *FREEZET+1* | -0.000 | -0.059*** | -0.056** |
|  | (0.03) | (0.02) | (0.02) |
| *EIMPNAT *FREEZET+1* |  |  | 0.097 |
|  |  |  | (0.10) |
| *EIMPOFF *FREEZET+1* |  |  | 0.050 |
|  |  |  | (0.12) |
| *EIMPIND *FREEZET+1* |  |  | 0.044 |
|  |  |  | (0.05) |
| *EMKT1-5%* | 0.040 | -0.122*** | -0.041 |
|  | (0.06) | (0.03) | (0.03) |
| *EMKT5-10%* | 0.067 | -0.215*** | -0.031 |
|  | (0.09) | (0.04) | (0.05) |
| *EMKT10%* | -0.051 | -0.204*** | -0.076 |
|  | (0.10) | (0.05) | (0.05) |
| All other controls from Eq. (1) | Yes | Yes | Yes |
| Mortality table controls | Yes | Yes | Yes |
| Year & fiscal year-end FE | Yes | Yes | Yes |
| Actuarial firm FE | Yes | Yes | Yes |
| Observations | 1947 | 2044 | 3991 |
| Adjusted R-squared | 0.827 | 0.849 | 0.838 |

***, ****, ***** indicate statistical significance at 10%, 5%, and 1% levels. Robust standard errors are in parentheses. The dependent variable is *DR*, the discount rate assumption used to discount projected future benefit payments to present value. Columns (1a)–(1b) are partitions on the annual median of *MTR,* which is pre-financing marginal tax rates, constructed Blouin et al. (2010). *FREEZET+1* is an indicator variable set to one if the firm announces a hard or soft freeze of any of its pension plans effective the following year. *EIMPNAT*, *EIMPOFF*, and *EIMPIND* capture (the size of each plan sponsor client / sum of sizes of all plan clients of that actuary in that year), with size measured by the number of employee-beneficiaries, and denominator defined at the firm, office, and individual-actuary level, respectively. *EMKT1-5%*, *EMKT5-10%*, and *EMKT10%* are indicators for actuarial firm with 1%–5%, 5%–10%, or >10% size-weighted market share that year. All other variables are defined in Appendix B of the manuscript. FE denotes fixed effects.

The results in Columns (1a)–(1b) do not show a clear pattern: *EIMPIND* is significant in the high-*MTR* subsample, but *EIMPOFF* is significant in the low-*MTR* subsample. Similarly for Column (2), while the baseline coefficient on *FREEZET+1* is negative and significant (indicating that sponsors freezing benefits in the following year tend to choose discount rates on average 5.6 bps lower), the interactions of *FREEZET+1* with the *EIMP* measures are not.

On the whole, partitioning on incentives to inflate reported funding status (Table 5 of the manuscript) reveals a strong difference between important and less-important clients in the high-incentive group, with no corresponding difference between important and less-important clients in the low-incentive group. To the contrary, partitioning (or interacting) by incentives to deflate reported funding status does not show a similar result. This is consistent with actuaries facing an asymmetric cost function with respect to allowing conservative discount rates as opposed to aggressive discount rates. If the costs of allowing conservative rates are negligible, or simply much smaller than the costs of allowing aggressive rates, then actuaries might acquiesce to conservative rates for all (or almost all) their clients, not just the important ones. Similar arguments are made by Becker et al. (1998) in studying auditor monitoring: when studying the association between Big *n* auditors and earnings management, they argue that income-increasing discretionary accruals are the appropriate dependent variable, “because while auditors are routinely sued for allowing earnings management that overstates earnings, but there is no evidence that they are sued for earnings management that understates earnings.” The parallel in the actuary setting is that actuaries are typically sued for assumptions that allow sponsors to inflate reported funding status, but not for assumptions that depress it. Gaver and Paterson (2001, 2007), making similar arguments, examine the association between auditor monitoring and *under*-reserving by insurance companies.

There are two subtleties with freezes that are worth noting. First, by allowing sponsors to choose overly conservative discount rates ahead of negotiations with labor unions, actuaries might (knowingly or unwittingly) be helping sponsors to push benefit cuts through, which could hurt beneficiaries. To my knowledge, though, there have been no cases of lawsuits against actuaries alleging that they so contributed to benefit cuts by allowing conservative assumptions; the bulk of lawsuits argue instead that they contributed to insufficient funding by allowing *aggressive* assumptions.

Second, when a sponsor freezes a plan by ending further benefit accruals, the plan slowly winds down over time, because new cohorts of beneficiaries cease to enter. As a result, actuaries might actually have an interest in *preventing* such a freeze by their most important clients. This could, in turn, imply that actuaries are less willing to allow conservative assumptions for important clients contemplating a freeze; conversely it could imply greater willingness on their part to allow aggressive assumptions that inflate reported funding status, to stave off discussions of real actions such as benefit freezes. (This could be another channel responsible for the positive association we observe between client importance and discount rates.) It is a fascinating question as to when and why sponsors of underfunded plans would choose reporting actions (e.g., aggressive assumptions that mask the true level of underfunding) versus real actions (cutting or freezing benefits), and when and why they would switch from one strategy to another, but the issues involved are complex enough to be beyond the scope of the present study.

**Table OA4: Balance sheet incentives or income statement incentives?**

Discount rate assumptions affect both the pension obligation (on the balance sheet) and pension expense (on the income statement). However, the maintained assumption has been that sponsors overstate discount rates to reduce the pension obligation reported on the balance sheet. This is primarily because a higher discount rate unambiguously reduces the PBO, while its effect on pension expense is not as clear.

The discount rate affects pension expense through both the service cost and the interest cost. While a higher discount rate unambiguously decreases service cost, it could decrease *or* increase interest cost. For plans with sufficiently low duration, a higher discount rate increases the interest cost (Fried, Davis, and Davis-Friday 2010). This has two related implications for how discount rates affect pension expense. (1) When the effects on service cost and interest cost offset each other, the discount rate becomes a rather weak lever with which to manage pension expense. (2) At the extreme, for the lowest-duration plans, the increase in interest cost could even overwhelm the decrease in service cost, and for these plans, a higher discount rate actually results in higher, not lower pension expense.

Fried, Davis, and Davis-Friday (2010) present a mathematical illustration of these effects, summarized below.

**Table OA4.1: Illustration of how discount rates affect pension expense, summarized from Fried, Davis, and Davis-Friday (2010)**

Consider the following pension projected benefit obligation (PBO):

where *FVi* is the payment in period *i*; *r* is the discount rate; N is the total number of periods. The duration (weighted average years to maturity) of this PBO is:

If we consider a simplified version of this pension plan that only makes one lump-sum payment at time T, then:

and

The interest cost (IC) equals the discount rate (*r*) times the PBO (*r***PBO*). Any increase in *r* will decrease the PBO, so the net effect on the product *r*PBO* depends on which effect dominates. Formally:

Whether *IC* increases or decreases with a change in *r* hence depends on the term in brackets. If the term in brackets is negative, then an increase in *r* decreases *IC.* If the term in brackets is positive, then an increase in *r* increases *IC.* Expressed differently:

To gauge how discount rates actually affect pension expense in my sample, I hand-collect disclosures from 10-Ks quantifying the sensitivity of pension expense to discount rate changes, for a small subsample of the 25 largest plan sponsors (by plan assets size) from my sample. These disclosures are essentially voluntary and usually found in the critical accounting policies’ section of the MD&A or sometimes in the pension footnote itself. I examine the largest plan sponsors because these voluntary disclosures tend to be highest-quality for large firms with very material pension plans, and collect the latest available disclosures, again because these disclosures have been increasingly better-populated over time. I summarize these sensitivities in Table OA4.2.

Table OA4.2, Panel A, shows that, for 64% of these firms, a higher discount rate lowers pension expense; for another 24%, a higher discount rate increases pension expense; and the remaining 12% do not disclose the relevant sensitivities. Furthermore, for the firms for which a higher discount rate lowers pension expense, Panel B shows that the median sensitivity of pension expense to a 1-bp higher discount rate is 88% that of the sensitivity of pension expense to 1-bp higher ERR (expected rate of return on pension assets).

I further hand-collect these sensitivities for a second subsample of the 25 lowest-duration plans from my sample (Panel C). Consistent with the Fried, Davis, and Davis-Friday (2010) propositions, a higher discount rate lowers pension expense only for 36% while increasing it for 44% (almost twice the proportion in Panel A); another 20% do not disclose. Even for the firms for which a higher discount rate lowers pension expense, the median sensitivity of pension expense to a 1-bp higher discount rate is only 17% of the sensitivity of pension expense to a 1-bp higher ERR, indicating that the service cost and interest cost effects wash out to a large extent for these firms (Panel D).

These summary statistics reveal that both effects described above are prevalent in the sample. That is, the spread in duration among plans in the sample is sufficiently large that there are a nontrivial number of firms for which higher discount rates actually increase pension expense, that is, the second effect. Furthermore, even for those firms for which a higher discount rate lowers pension expense, the discount rate assumption is a relatively weak lever with which to manage pension expense when compared to the ERR assumption—an actuarial assumption that only affects pension expense (and not the balance sheet) and has an unambiguous effect on pension expense at that: higher ERRs always lower pension expense.

**Table OA4.2: Descriptive statistics of sensitivity of pension expense to changes in discount rate**

*Panel A: Direction of sensitivity, for sample of 25 largest pension plans*

| *Subsample* | *Number of observations* | *Percentage of sample* |
| --- | --- | --- |
| Higher DR leads to lower pension expense | 16 | 64% |
| Higher DR leads to higher pension expense | 6 | 24% |
| Sensitivity of pension expense to DRs not disclosed | 3 | 12% |
| Total sample | 25 | 100% |

*Panel B: Magnitude of sensitivity to discount rates compared to sensitivity to ERRs for sample of 25 largest pension plans*

|  | *P25* | *P50* | *P75* | *Mean* | *SD* | *Num* |
| --- | --- | --- | --- | --- | --- | --- |
| For the subsample for which higher DR leads to lower pension expense | | | | | | |
| Sensitivity of pension expense to 25 bps change in DR (1) | | | | | | |
|  | 21m | 47.67m | 86m | 60.47m | 55.16m | 16 |
| Sensitivity of pension expense to 25 bps change in ERR (2) | | | | | | |
|  | 44m | 73m | 100m | 72.03m | 37.33m | 15 |
| (1) / (2) | 0.30 | 0.88 | 1.41 | 0.84 | 0.61 | 15 |
| For the subsample for which higher DR leads to higher pension expense | | | | | | |
| Sensitivity of pension expense to 25 bps change in DR (1) | | | | | | |
|  | 11.25m | 16.5m | 58m | 29m | 24.65m | 6 |
| Sensitivity of pension expense to 25 bps change in ERR (2) | | | | | | |
|  | 32m | 35.25m | 40m | 51.92m | 48.06m | 6 |
| (1) / (2) | 0.30 | 0.42 | 0.75 | 0.68 | 0.63 | 6 |

For Panels A and B, the plan sponsors included in the final sample for this paper are first sorted in descending order of US-based pension assets size from the 10-K (*FVPAUS*), and discount rate sensitivity disclosures are hand-collected for the top 25 plan sponsors. These disclosures are found either in the “critical accounting policies” section of the MD&A or in the pension footnote and are hand-collected for the latest filing period available, even if that falls outside the sample period used in the study. Some plan sponsors disclose sensitivities to 25 bps change in discount rates, and others to 50 bps or 100 bps; all sensitivities are normalized to 25 bps change with linear transformations. Some plan sponsors disclose sensitivity to discount rate increases and decreases separately; in these cases, a simple average of the two sensitivities is taken.

*Panel C: Direction of sensitivity, for sample of 25 shortest-duration plans*

| *Subsample* | *Number of observations* | *Percentage of sample* |
| --- | --- | --- |
| Higher DR leads to lower pension expense | 9 | 36% |
| Higher DR leads to higher pension expense | 11 | 44% |
| Sensitivity of pension expense to DRs not disclosed | 5 | 20% |
| Total sample | 25 | 100% |

*Panel D: Magnitude of sensitivity to discount rates compared to sensitivity to ERRs for sample of 25 shortest-duration plans*

|  | *P25* | *P50* | *P75* | *Mean* | *SD* | *Num* |
| --- | --- | --- | --- | --- | --- | --- |
| For the subsample for which higher DR leads to lower pension expense | | | | | | |
| Sensitivity of pension expense to 25 bps change in DR (1) | | | | | | |
|  | 0.20m | 0.40m | 0.88m | 3.74m | 8.06m | 9 |
| Sensitivity of pension expense to 25 bps change in ERR (2) | | | | | | |
|  | 1.4m | 1.8m | 5.9m | 3.15m | 2.71m | 7 |
| (1) / (2) | 0 | 0.17 | 0.42 | 0.74 | 1.51 | 7 |
| For the subsample for which higher DR leads to higher pension expense | | | | | | |
| Sensitivity of pension expense to 25 bps change in DR (1) | | | | | | |
|  | 0.2m | 1m | 2.5m | 1.41m | 1.56m | 11 |
| Sensitivity of pension expense to 25 bps change in ERR (2) | | | | | | |
|  | 0.3m | 1.1m | 1.8m | 51.03m | 157.76m | 10 |
| (1) / (2) | 0.29 | 0.50 | 0.83 | 0.66 | 0.59 | 9 |

For Panels C and D, the plan sponsors included in the final sample for this paper are first sorted in ascending order of *DURINDEX*, and discount rate sensitivity disclosures are hand-collected for the lowest 25 plan sponsors. These disclosures are found either in the “critical accounting policies” section of the MD&A or in the pension footnote and are hand-collected for the latest filing period available, even if that falls outside the sample period used in the study. Some plan sponsors disclose sensitivities to 25 bps change in discount rates, and others to 50 bps or 100 bps; all sensitivities are normalized to 25 bps change with linear transformations. Some plan sponsors disclose sensitivity to discount rate increases and decreases separately; in these cases, a simple average of the two sensitivities is taken.

To probe the assumption that balance sheet incentives, rather than income statement incentives, are behind aggressive discount rates, I design a test using the specific nature of the non-monotonic relation between discount rates and pension expense. In Table OA4.3, I present results of partitioning the sample by a comprehensive measure of pension duration (*DURINDEX)*, constructed by sorting on each duration control to create a quartile rank, and then adding up quartile ranks for all duration controls to create a duration “index.”

Among lower-duration plans, a higher *DR* should improve the balance sheet (by lowering PBO) while either having negligible effect on or hurting the income statement (by increasing pension expense). In this subsample, therefore, balance-sheet motivations to improve funded status would dictate a higher discount rate, whereas income-statement motivations to reduce pension expense would either be negligible or dictate a *lower* discount rate. However, as Table OA4.3 shows, client importance still associates positively with discount rates for these plans, which is consistent with pressure on actuaries for a *higher* rate. This suggests in turn that it is not income statement incentives but balance sheet incentives that drive assumption setting.

A curious finding from this analysis, however, is that client importance effects are positive but insignificant among longer-duration plans, where a higher discount rate translates not only into lower PBOs but also into lower pension expense. Given that we would predict the strongest incentives to overstate discount rates for these firms (because both balance-sheet and income-statement incentives point to a higher discount rate), it is an open question as to why client importance measures do not load significantly here. One possibility is that a 1-bp change in the discount rate has a much greater impact on PBO for a longer-duration plan. (An “x” bps higher discount rate lowers the PBO by approximately “X*D” bps, where D is the plan duration. For example, a 1% higher discount rate lowers the PBO of a 10-year-duration plan by 10% while lowering the PBO of a 20-year-duration plan by 20%. Therefore, the amount of manipulation in discount rates needed to achieve a given reduction in PBO might be lower for these plans.

**Table OA4.3: Partitioning on pension duration**

|  | *(1a)* | *(1b)* |
| --- | --- | --- |
|  | *Low DURINDEX*  *(short duration - higher discount rates could lead to higher pension expense)* | *High DURINDEX*  *(long duration - higher discount rates lead to lower pension expense)* |
| *Dependent variable* | *DR* | *DR* |
| *EIMPNAT* | -0.238 | 0.102 |
|  | (0.22) | (0.16) |
| *EIMPOFF* | 0.102*** | 0.049 |
|  | (0.03) | (0.07) |
| *EIMPIND* | 0.038** | 0.024 |
|  | (0.02) | (0.02) |
| Constant | 3.989*** | 4.860*** |
|  | (0.33) | (0.38) |
| All other controls from Eq. (1) | Yes | Yes |
| Mortality table FE | Yes | Yes |
| Year & fiscal year-end FE | Yes | Yes |
| Actuarial firm FE | Yes | Yes |
| Observations | 1884 | 2107 |
| Adjusted R-squared | 0.840 | 0.852 |

***, ****, ***** indicate statistical significance at 10%, 5%, and 1% levels. Robust standard errors are in parentheses. The dependent variable is *DR*, the discount rate assumption used to discount projected future benefit payments to present value. Partitions are by the annual median of *DURINDEX*, an index that ranks firm-year observations on pension duration, using the age distribution of beneficiaries and other plan characteristics. All observations are sorted independently in ascending order of *%ACTIVEUNVEST*, *%ACTIVEVEST*, -1**%RETIRED*, *NORMALCOST*, -1**DISBURSEMENTS*, and -1**%FROZEN*, and -1**%CASHBAL* and assigned a rank *q* (1–4) if the observation falls into the *q*th quartile of the distribution of that variable. All ranks are added up to form *DURINDEX*. Higher (lower) values indicate longer (shorter) duration. *EIMPNAT*, *EIMPOFF*, and *EIMPIND* capture (the size of each plan sponsor client / sum of sizes of all plan clients of that actuary in that year), with size measured by the number of employee-beneficiaries and denominator defined at the firm, office, and individual-actuary level, respectively. All other variables are defined in Appendix B of the manuscript.

**Table OA5: Examining debt covenant violations**

Examining the motivations for inflating reported funding status helps to design a further test on the role of actuary client importance. Sponsors would want to window-dress the balance sheet by inflating pension funding status, to raise financing at better terms, for example, or to avoid violating net worth-based debt covenants. Focusing on the latter contracting motivation, if actuary client importance in fact captures ability to manage pension assumptions, then less influential clients may lack the ability to window-dress their balance sheets to avoid covenant violation, even if they have the incentives to do so. Therefore we would expect the less influential clients to be more likely to ultimately violate covenants. The violation of covenants provides us a clear outcome indicating that the sponsors in question were unable to manage assumptions “sufficiently,” as opposed to only looking at whether discount rates are higher or lower in cross-sectional comparisons.

To examine this proposition, I merge the *H1* sample with covenant violation data kindly provided by Professor Amir Sufi. Panel A displays univariate statistics of the incidence of one-year-ahead covenant violation, in samples created by partitioning on client importance. Across all three levels of client importance, sponsors that are less important clients of their actuaries are consistently more likely to violate covenants in the subsequent year, consistent with these clients having lower ability to understate pension liabilities to stay within covenant thresholds.

Crucial to any examination of contracting motivations is the fact that the pension funding status only went on-balance sheet in 2006, with the passage of SFAS 158 *Employer’s Accounting for Defined Benefit Pension and Other Postretirement Plans.* Contracting motivations hence only apply post 2006, and so Panel B presents a sharper test with only post-SFAS 158 observations. Sponsors that are more influential clients of their actuarial office (individual actuary) are only about one-third (one-half) as likely as the less-influential group to violate a covenant. Finally, refining the sample further in Panel C to only firms with strong incentives to inflate reported funding status—as captured by an above-median combination of *LEV* and *FUNDINGDEBTUSNONDISC*—continues to show that less-influential clients are more likely to violate covenants. Summary statistics of client importance in ex post samples of violators and nonviolators (Panel D) reinforce the conclusion that the firms ultimately unable to avoid violation tend to be less important to their actuaries.

*Panel A: The incidence of debt covenant violations*

|  | *Partitions by:* | | *p-value for diff* | |
| --- | --- | --- | --- | --- |
|  | *Low EIMPNAT* | *High EIMPNAT* | |  |
| Proportion of sample violating covenants in year *t+1* | 0.103 | 0.082 | | 0.05** |
|  | *Low EIMPOFF* | *High EIMPOFF* | |  |
| Proportion of sample violating covenants in year *t+1* | 0.110 | 0.075 | | 0.00*** |
|  | *Low EIMPIND* | *High EIMPIND* | |  |
| Proportion of sample violating covenants in year *t+1* | 0.103 | 0.081 | | 0.04** |

*Panel B: The incidence of debt covenant violations in the post-SFAS 158 regime*

|  | *Partitions by:* | | *p-value for diff* | |
| --- | --- | --- | --- | --- |
|  | *Low EIMPNAT* | *High EIMPNAT* | |  |
| Proportion of sample violating covenants in year *t+1* | 0.067 | 0.057 | | 0.62 |
|  | *Low EIMPOFF* | *High EIMPOFF* | |  |
| Proportion of sample violating covenants in year *t+1* | 0.09 | 0.033 | | 0.00*** |
|  | *Low EIMPIND* | *High EIMPIND* | |  |
| Proportion of sample violating covenants in year *t+1* | 0.08 | 0.043 | | 0.06* |

*Panel C: The incidence of debt covenant violations post-SFAS 158 for firms with strong incentives to manipulate*

|  | *Partitions by:* | | *p-value for diff* | |
| --- | --- | --- | --- | --- |
|  | *Low EIMPNAT* | *High EIMPNAT* | |  |
| Proportion of sample violating covenants in year *t+1* | 0.103 | 0.082 | | 0.05** |
|  | *Low EIMPOFF* | *High EIMPOFF* | |  |
| Proportion of sample violating covenants in year *t+1* | 0.110 | 0.075 | | 0.00*** |
|  | *Low EIMPIND* | *High EIMPIND* | |  |
| Proportion of sample violating covenants in year *t+1* | 0.103 | 0.081 | | 0.04** |

*Panel D: Client importance of violators and nonviolators in the post-SFAS 158 regime*

|  | *Violates covenants in year t+1* | *No violation in year t+1* | *p-value for diff* |
| --- | --- | --- | --- |
| *EIMPNAT* | 0.004 | 0.033 | 0.20 |
| *EIMPOFF* | 0.043 | 0.114 | 0.03** |
| *EIMPIND* | 0.272 | 0.408 | 0.03** |

***, ****, ***** indicate statistical significance at 10%, 5%, and 1% levels. Statistics in Panel A are for a sample of 3,055 firm-year observations from the final sample matched to the covenant violations dataset used by Nini et al. (2011). This dataset was kindly provided by Professor Amir Sufi at: <http://faculty.chicagobooth.edu/amir.sufi/data.html>. Client importance partitions are based on annual medians, and the dependent variable is an indicator set to one if the firm violates any debt covenant in the subsequent fiscal year. Statistics in Panel B and Panel D are for a sample of 599 firm-year observations to which the SFAS 158 regime applies. Statistics in Panel C are for a sample of 349 firm-year observations that are above the annual median of “total” debt, calculated as the combination of firm leverage (*LEV)* and *FUNDINGDEBTUSNONDISC* wherever the pension plans are underfunded (i.e., *FUNDINGDEBTUSNONDISC* is positive).

**Table OA6: Incentives arising from non-actuarial services provided by the actuary**

Non-actuarial services are very difficult to observe or measure as the provision of these services is not required disclosure, either for the clients that procure them or for the actuaries that provide them. In the absence of these data, I use public disclosures to the extent available to examine variation in actuarial firms’ incentives to sell non-actuarial services and whether that relates to more aggressive assumptions.

First, I examine differences in assumptions across clients of the largest actuarial firms (*EMKT10%*=1*, EMKT5-10%*=1*,* or *EMKT1-5%=*1) and the smaller actuarial firms, under the assumption that the larger firms typically offer a more complete suite of services. Column (1) reruns the baseline Eq. (1) model, with the sole difference being that the model is run without actuarial firm fixed-effects, to examine the average differences in discount rate assumptions recommended by actuaries within each size tier. Results show that actuaries in the largest and second-largest size tiers recommend discount rate assumptions that are 6 bps and 8 bps higher than actuaries in the smallest size tier. Notice that, to the extent to which controls for duration are incomplete, this will bias againstfinding such a positive relation—because larger actuaries typically have larger clients, and larger plans tend to be lower-duration, which would predict lower discount rates, not higher ones. These results must, however, be interpreted with caution, as many omitted variables and unobservable factors could drive differences between clients of larger versus smaller actuarial firms.

I attempt to refine these tests by constructing indicators for whether the actuary is known to provide some other service. I first incorporate *ACTUARY_AUD*, an indicator set to one if the actuary happens to be employed by an accounting firm. To construct *ACTUARY_AUD*, I obtain the list of all accounting firms that appear as auditors in the Audit Analytics database, and compare this list to actuary firm names from Form 5500s to identify whether any actuaries in the sample happen to be employed by accounting firms.

*ACTUARY_AUD*, incorporated in Column (2), is negative but insignificant. In Column (3), I split *ACTUARY_AUD* into two indicators, one for the pre-SOX and another for the post-SOX period. This reveals the fascinating pattern that, in the pre-SOX era, audit firms that did actuarial valuations were not significantly different from other actuarial firms; however, in the post-SOX period, audit firms providing actuarial valuations recommend discount rates on average 8.5 bps more conservative than actuarial firms. This is in tune with audit firms’ heightened litigation concerns, especially post-SOX (Gaver and Paterson 2001).

I then exploit proxy statement disclosures required from fiscal year 2006 to identify (1) which actuarial firms also provide compensation consulting services and (2) whether each actuary also provides compensation consulting services to that particular client. From 2006 onward, issuers are required to disclose whether their compensation committee or management used the services of a compensation consultant and, if so, whom. I hand-collect these disclosures for all firms in the sample for the 2006–2008 period and set *ACTUARY_CC1* to one if the actuary appears as a compensation consultant even once. (As I hand-collect these disclosures only for issuers in the sample and not for the entire universe of 10-K issuers, *ACTUARY_CC1* is measured with noise, because an actuary could have provided compensation consulting services to an issuer that does not feature in this sample.) I set *ACTUARY_CC2* to one if the actuary is also named as the compensation consultant to that particular client, in the client’s proxy statement. Note that tests involving *ACTUARY_CC1* and *ACTUARY_CC2* only use the 2006–2008 subsample.

Column (4) incorporates *ACTUARY_CC1*. *ACTUARY_CC1* is positive and significant, with the coefficient indicating that actuarial firms in the business of providing compensation consulting tend to recommend discount rates almost 7 bps higher than the other actuarial firms. In Column (5), I incorporate *ACTUARY_CC2* as well. While *ACTUARY_CC1* remains positive and significant, *ACTUARY_CC2* is insignificant.

|  | *(1)* | *(2)* | *(3)* | *(4)* | *(5)* |
| --- | --- | --- | --- | --- | --- |
|  | *All firms* | *All firms* | *All firms* | *2006-2008* | *2006-2008* |
| *Dependent variable* | *DR* | *DR* | *DR* | *DR* | *DR* |
| *ACTUARY_AUD* |  | -0.005 |  |  |  |
|  |  | (0.04) |  |  |  |
| *ACTUARY_AUD_PRESOX* |  |  | 0.078 |  |  |
|  |  |  | (0.05) |  |  |
| *ACTUARY_AUD_POSTSOX* |  |  | -0.085* | -0.122* | -0.121* |
|  |  |  | (0.05) | (0.07) | (0.07) |
| *ACTUARY_CC1* |  |  |  | 0.068* | 0.068* |
|  |  |  |  | (0.04) | (0.04) |
| *ACTUARY_CC2* |  |  |  |  | -0.004 |
|  |  |  |  |  | (0.02) |
| *EMKT1-5%* | 0.019 | 0.019 | 0.014 | -0.071** | -0.071** |
|  | (0.03) | (0.03) | (0.03) | (0.04) | (0.04) |
| *EMKT5-10%* | 0.081*** | 0.080*** | 0.079*** | -0.024 | -0.024 |
|  | (0.03) | (0.03) | (0.03) | (0.05) | (0.05) |
| *EMKT10%* | 0.059*** | 0.058** | 0.056** | -0.044 | -0.043 |
|  | (0.02) | (0.02) | (0.02) | (0.04) | (0.04) |
| *EIMPNAT* | -0.138* | -0.139* | -0.143* | -0.324*** | -0.324*** |
|  | (0.07) | (0.07) | (0.07) | (0.10) | (0.10) |
| *EIMPOFF* | 0.082** | 0.083** | 0.087** | 0.072 | 0.072 |
|  | (0.04) | (0.04) | (0.04) | (0.06) | (0.06) |
| *EIMPIND* | 0.034* | 0.034* | 0.034* | 0.040 | 0.040 |
|  | (0.02) | (0.02) | (0.02) | (0.03) | (0.03) |
| Constant | 4.423*** | 4.424*** | 4.405*** | 2.856*** | 2.853*** |
|  | (0.33) | (0.33) | (0.33) | (0.40) | (0.40) |
| All other controls from Eq. (1) | Yes | Yes | Yes | Yes | Yes |
| Mortality table FE | Yes | Yes | Yes | Yes | Yes |
| Year & fiscal year-end FE | Yes | Yes | Yes | Yes | Yes |
| Actuarial firm FE | No | No | No | No | No |
| Observations | 3991 | 3991 | 3991 | 1116 | 1116 |
| Adjusted R-squared | 0.832 | 0.832 | 0.832 | 0.635 | 0.635 |

***, ****, ***** indicate statistical significance at 10%, 5%, and 1% levels. Robust standard errors are in parentheses. The dependent variable is *DR*, the discount rate assumption used to discount projected future benefit payments to present value. *ACTUARY_AUD* is an indicator set to one if the actuarial firm also happens to be an accounting firm, as identified by that firm appearing in Audit Analytics as a 10-K auditor for a publicly traded issuer. *ACTUARY_AUD_PRESOX* (*ACTUARY_AUD_POSTSOX*) is an indicator set to one if *ACTUARY_AUD* =1 and the fiscal year-end belongs to the pre-July 2002 (on or after July 2002) period. *ACTUARY_CC1* is an indicator set to one if the actuarial firm also provides compensation consulting services, as identified by this firm being named as the compensation consultant in proxy statements of *any* publicly traded issuer in the Final Sample (1,116 observations for 2006 and later, which is the period for which compensation consultants were required to be named on proxy statements). *ACTUARY_CC2* is an indicator set to one if the actuarial firm for any issuer is a named compensation consultant (either to the compensation committee or to the management) for that very issuer. *EIMPNAT*, *EIMPOFF*, and *EIMPIND* capture (the size of each plan sponsor client / sum of sizes of all plan clients of that actuary in that year), with size measured by the number of employee-beneficiaries, and denominator defined at the firm, office, and individual-actuary level, respectively. All other variables are defined in Appendix B of the manuscript. Actuarial firm FE are not included because those fixed-effects would subsume *ACTUARY_AUD*, *ACTUARY_AUD_PRESOX*, *ACTUARY_AUD_POSTSOX*, and *ACTUARY_CC1*.

**Table OA7: How auditor monitoring interacts with client pressure on actuaries**

To examine how client pressure on actuaries interacts with auditor scrutiny, I run Eq. (1) on subsamples partitioned on auditor oversight. To create a comprehensive measure of auditor oversight, I combine the Big 4 indicator (*10KBIG4*) with quartile ranks of audit office size (*LnAUDOFFICESIZE*), quartile ranks of auditor client importance (*AUDFEEIMP*), the Big 4 indicator for the Form 5500 audit (%*F5500BIG4*), and the limited-scope indicator for the Form 5500 audit (1-%*LIMSCOPE*) to create an “index” of auditor oversight (*AUDINDEX*), with higher values indicating stronger oversight.

Results support the notion that stronger auditor scrutiny leads to even more client pressure on actuaries. In other words, increased auditor scrutiny could shift managers’ focus away from the more readily auditable channels of manipulation—the low-hanging fruit, so to speak, and toward areas of reporting where inherent estimation uncertainty is high enough that auditors cannot impose their judgment on managers. In this regard, audit guidance is clear that for items valued with a valuation model, “the auditor does not function as an appraiser and is not expected to substitute his or her judgment for that of the entity’s management” (AU 328.28 *Auditing Accounting Estimates*). Pension accounting, with its high inherent uncertainty, could be one such target area.

As a further test, Columns (2a)–(2b) of Panel B partition into pre- and post-SOX periods, with auditor monitoring expected to be higher post SOX. Client pressure appears to be stronger in the post-SOX period, consistent with the results on cross-sectional partitions from Columns (1a)–(1b). The sample period, however, is such that the post-SOX sample is much larger than the pre-SOX sample, necessitating caution in interpreting these results. Throughout Panel B, the baseline coefficients on *LnAUDOFFICESIZE* and *AUDFEEIMP* (untabulated) remain negative and significant.

|  | *(1a)* | *(1b)* | *(2a)* | *(2b)* |
| --- | --- | --- | --- | --- |
|  | *Low AUDINDEX*  *Weak auditor oversight* | *High AUDINDEX*  *Strong auditor oversight* | *Pre-SOX* | *Post-SOX* |
| *Dependent variable* | *DR* | *DR* | *DR* | *DR* |
| *EIMPNAT* | -0.294*** | 0.484 | 0.211 | -0.056 |
|  | (0.11) | (0.37) | (0.24) | (0.16) |
| *EIMPOFF* | 0.051 | 0.054* | 0.051 | 0.082** |
|  | (0.04) | (0.03) | (0.04) | (0.04) |
| *EIMPIND* | 0.024 | 0.039** | 0.024 | 0.047*** |
|  | (0.02) | (0.02) | (0.02) | (0.01) |
| Constant | 4.307*** | 4.737*** | 4.618*** | 4.091*** |
|  | (0.37) | (0.55) | (0.49) | (0.33) |
| All other controls from Eq. (1) | Yes | Yes | Yes | Yes |
| Mortality table FE | Yes | Yes | Yes | Yes |
| Year & fiscal year-end FE | Yes | Yes | Yes | Yes |
| Actuarial firm FE | Yes | Yes | Yes | Yes |
| Observations | 2689 | 1302 | 1010 | 2981 |
| Adjusted R-squared | 0.825 | 0.871 | 0.508 | 0.66 |

***, ****, ***** indicate statistical significance at 10%, 5%, and 1% levels. Robust standard errors are in parentheses. The dependent variable is *DR*, the discount rate assumption used to discount projected future benefit payments to present value. In Columns (1a)–(1b), partitions are by *AUDINDEX*, an index of auditor monitoring. *AUDINDEX* = *10KBIG4* + Quartile rank(*LnAUDOFFICESIZE*) sorted in ascending order + Quartile rank(*AUDFEEIMP*) sorted in ascending order + *%F5500BIG4* + (1-*%LIMSCOPE*). Higher (lower) values indicate stronger auditor oversight. In Columns (2a)–(2b), partitions are by the fiscal year-end. Fiscal years ending before (on or after) July 2002 belong to the pre-SOX (post-SOX) sample. *EIMPNAT*, *EIMPOFF*, and *EIMPIND* capture (the size of each plan sponsor client / sum of sizes of all plan clients of that actuary in that year), with size measured by the number of employee-beneficiaries, and denominator defined at the firm, office, and individual actuary level, respectively. All other variables are defined in Appendix B of the manuscript.

**Table OA8: Replicating the results with fee-based client importance measures**

To alleviate the concern that the positive coefficient on *EIMP* measures could simply be capturing the stronger incentives of larger plans to inflate discount rates, I rerun all tests with fee-based measures of client importance. To construct fee-based measures of client importance, I first assume that total fees largely reflect actuarial fees, as disaggregated fee data (available for 1992–1998, due to different erstwhile disclosure requirements) show that actuarial fees comprise 85% of total fees for the median firm. Then, to address the issue that fees are unavailable for much of the plan universe, making the measurement of the denominator (total fees from the actuary’s client portfolio) incomplete, I construct a plan-level model to explain fees, for all filings with available data and use these coefficients to predict fees for filings without fee data. I then measure total fees for the actuary’s client portfolio with actual fees when disclosed and predicted fees otherwise to construct fee-based measures of client importance (*FEEIMPNAT*, *FEEIMPOFF*, *FEEIMPIND*).

I tabulate the fee model below in Columns (1)–(3). I look to audit fee models (e.g., Whisenant, Sankaraguruswamy, and Raghunandan 2003) to motivate determinants of actuarial fees. Actuarial effort and fees should increase with plan size (measured in beneficiaries, liabilities, and assets) and with plan complexity, captured with indicators for the extent to which benefits depend on estimates of future pay increases. I include fixed-effects for year, year-end, sponsor’s industry, location, and actuary. The adjusted R2 is 52.6%, lower than in audit fee models (which have R2 in the 70%–80% range) but still reasonable. The considerable explanatory power (43%) that plan size measures have for fees also help to validate the assumption that client size is correlated with quasi-rents, on the basis of which the size-based client importance measures are constructed.

|  | Actuarial fee model | | | Replicating Eq. (1) with fee-based measures |
| --- | --- | --- | --- | --- |
|  | (1) | (2) | (3) | (4) |
| *Dependent variable* | *LnFEEPLAN* | *LnFEEPLAN* | *LnFEEPLAN* | *DR* |
| *LnEMPSPLAN* | **0.158***** | **0.152***** | **0.137***** |  |
|  | (0.00) | (0.00) | (0.00) |  |
| *LnASSETSPLAN* | **0.204***** | **0.199***** | **0.192***** |  |
|  | (0.01) | (0.01) | (0.01) |  |
| *LnLIABSPLAN* | **0.163***** | **0.162***** | **0.124***** |  |
|  | (0.01) | (0.01) | (0.01) |  |
| *TERMINATEDPLAN* |  | **0.581***** | **0.494***** |  |
|  |  | (0.07) | (0.07) |  |
| *FROZENPLAN* |  | **-0.023** | **0.003** |  |
|  |  | (0.02) | (0.02) |  |
| *CASHBALPLAN* |  | **0.392***** | **0.358***** |  |
|  |  | (0.02) | (0.02) |  |
| Constant | **3.629***** | **2.778***** | **4.970** |  |
|  | (0.05) | (0.08) | (17429.31) |  |
|  |  |  |  |  |
| *FEEIMPNAT* |  |  |  | **-0.087** |
|  |  |  |  | (0.06) |
| *FEEIMPOFF* |  |  |  | **0.107***** |
|  |  |  |  | (0.04) |
| *FEEIMPIND* |  |  |  | **0.025***** |
|  |  |  |  | (0.01) |
|  |  |  |  |  |
| FE for year, year-end, industry, location, actuary | No | No | Yes | -- |
| All controls and FE from Eq. (1) | -- | -- | -- | Yes |
| Observations | 47,868 | 47,868 | 47,868 | 3991 |
| Adjusted R2 | 0.425 | 0.472 | 0.526 | 0.825 |

***, ****, ***** indicate statistical significance at 10%, 5%, and 1% levels. Robust standard errors are in parentheses. In Columns (1)–(3), the ordinary least squares regression is run at the plan-year level for 2000–2008, with all plan filings that have nonmissing, nonzero data on professional fees paid (the dependent variable) and sufficient data for all explanatory variables. All variables are from the Form 5500 and are at the plan level. The dependent variable (*LnFEEPLAN*) is the natural logarithm of [1+total professional fees paid], which is the total fees paid by the plan to actuaries, benefit plan auditors, lawyers, and valuation/appraisal experts [Schedule H Item 2(i)(1)]. Determinants are motivated from audit fee models (e.g., Whisenant et al., 2003). Actuarial effort and fees should increase with plan size and complexity. To capture plan size, I incorporate *LnASSETSPLAN*—the natural logarithm of [1+current value of plan assets (Schedule B Item 1(b)(1))], *LnLIABSPLAN*—the natural logarithm of [1+RPA ’94 current liability (Schedule B Item 2(b)(4), Col (3))], and *LnEMPSPLAN*—the natural logarithm of [1+number of employee-beneficiaries (Introduction Section 7(f))]. To capture plan complexity, I incorporate two indicators for whether the benefits is pay-based, as pay-based formulae require the effort to estimate future pay: *FROZENPLAN* and *CASHBALPLAN*—indicator variables set to one for frozen and cash-balance plans, respectively [Introduction Item 8(a)]. Employees in hard-frozen plans do not accrue additional benefits, requiring no estimates of future pay. Cash-balance plans also work such that beneficiaries’ accounts are credited every year with a “pay credit” that is a defined % of current compensation. In addition, I incorporate an indicator *TERMINATEDPLAN* for plans that have been terminated, as these plans involve no future benefit accruals whatsoever. Finally, I incorporate a set of fixed-effects for year, plan year-end month, plan sponsor’s industry by six-digit NAICS code [Introduction Item 2(d)], plan sponsor’s location by five-digit zip code [Introduction Item 2(a)], and for each actuarial firm with >5% size-weighted market-share and for each actuarial practice-office and individual with >1% size-weighted market-share (size measured by number of employee-beneficiaries of each plan). Coefficients from Column 3 are used to compute a predicted fee (*FEEHATPLAN*) for all plan filings for which fee data are unavailable. In Column (4), Eq. (1) from the manuscript is replicated but with fee-based client importance measures *FEEIMPNAT*, *FEEIMPOFF*, and *FEEIMPIND* replacing the size-based client importance measures *EIMPNAT*, *EIMPOFF*, and *EIMPIND*.

Column (4) of the above tables presents results of replicating Eq. (1) with fee-based measures. Fee-based client importance *FEEIMPNAT* has a mean (median) of 0.033 (0.00). *FEEIMPOFF* has a mean (median) of 0.096 (0.03). *FEEIMPIND* has a mean (median) of 0.418 (0.26). *FEEIMPOFF* and *FEEIMPIND* are positive and significant, with coefficient estimates very similar to those on size-based measures in Table 4 of the manuscript. Notwithstanding its limitations, the fact that fee-based measures broadly confirm the findings with size-based measures serves to triangulate the evidence presented.

I also replicate actuary switching tests with fee-based client importance measures. Note that the incidence of actuary switching is independent of the client importance measure used; only the designation of switches as importance-increasing is a function of how client importance is defined. Importance-increasing switches designated with *FEEIMP* measures are hence virtually identical to those designated with *EIMP* measures.

**Table OA9: Within-plan sponsor tests of H1**

|  | *(1a)* | *(1b)* | *(2a)* | *(2b)* |
| --- | --- | --- | --- | --- |
|  | *Low LEV* | *High LEV* | *Low FUNDING*  *DEBTUSNONDISC* | *High FUNDING*  *DEBTUSNONDISC* |
| *Dependent variable* | *DR* | *DR* | *DR* | *DR* |
| *EIMPNAT* | -0.130 | 0.061 | 0.086 | -0.085 |
|  | (0.13) | (0.07) | (0.11) | (0.09) |
| *EIMPOFF* | 0.080 | 0.106** | -0.081 | 0.168*** |
|  | (0.09) | (0.05) | (0.08) | (0.06) |
| *EIMPIND* | -0.032 | -0.004 | 0.008 | -0.054* |
|  | (0.03) | (0.03) | (0.03) | (0.03) |
| Constant | 4.948*** | 3.791*** | 3.950*** | 3.535*** |
|  | (0.91) | (0.54) | (0.57) | (0.46) |
| All other controls from Eq. (1) | Yes | Yes | Yes | Yes |
| Mortality table FE | Yes | Yes | Yes | Yes |
| Year & fiscal year-end FE | Yes | Yes | Yes | Yes |
| Actuarial firm FE | No | No | No | No |
| Plan sponsor FE | Yes | Yes | Yes | Yes |
| Observations | 1998 | 1993 | 1998 | 1993 |
| Adjusted R-squared | 0.883 | 0.904 | 0.882 | 0.894 |

***, ****, ***** indicate statistical significance at 10%, 5%, and 1%, levels. Robust standard errors are in parentheses. The dependent variable is *DR*, the discount rate assumption used to discount projected future benefit payments to present value. The plan sponsor-level fixed effects are included by adding a dummy for each plan sponsor in the sample. Columns (1a)–(1b) are partitions on the annual median of *LEV,* which is (long-term debt + debt in current liabilities) scaled by firm total assets*.* In Panel B, Columns (2a)–(2b) are partitions on the annual median of *FUNDINGDEBTUSNONDISC,*which is (*PBOUSNONDISC*-*FVPAUS*) scaled by firm total assets. *EIMPNAT*, *EIMPOFF*, and *EIMPIND* capture (the size of each plan sponsor client / sum of sizes of all plan clients of that actuary in that year), with size measured by the number of employee-beneficiaries, and denominator defined at the firm, office, and individual actuary level, respectively. All other variables are defined in Appendix B of the manuscript.
